# Supplementary material for: PAI-1-Dependent Inactivation of SMAD4-Modulated Junction and Adhesion Complex in Obese Endometrial Cancer
Source: PubMed Central journal article supplement — Cell Rep. Author manuscript; Available in PMC 2020 Nov 4. (PMC7641039; doi:10.1016/j.celrep.2020.108253), 2020-10-13
Supplement: NIHMS1638450-supplement-1.pdf [file NIHMS1638450-supplement-1.pdf]

**Cell Reports, Volume 33**

**Supplemental Information**

**PAI-1-Dependent Inactivation  
of SMAD4-Modulated Junction and Adhesion Complex  
in Obese Endometrial Cancer**

**Li-Ling Lin, Edward R. Kost, Chun-Lin Lin, Philip Valente, Chiou-Miin Wang, Mikhail G. Kolonin, Alexes C. Daquinag, Xi Tan, Nicholas Lucio, Chia-Nung Hung, Chen-Pin Wang, Nameer B. Kirma, and Tim H.-M. Huang**

**Table S1: Patients information for tissue microarrays from endometrial tumors. Related to Figure 1.**

|                   |                                                              |
|-------------------|--------------------------------------------------------------|
| <b>Age</b>        | 27-50 (mean=41.5, total, n=35)                               |
| <b>Histology</b>  | Endometrioid (94%)<br>Clear cell (3%)<br>Carcinosarcoma (3%) |
| <b>FIGO Stage</b> | I (86%)<br>II (6%)<br>III & IV (8%)                          |
| <b>BMI</b>        | 20-29 (20%)<br>30-39 (37%)<br>≥ 40 (43%)                     |

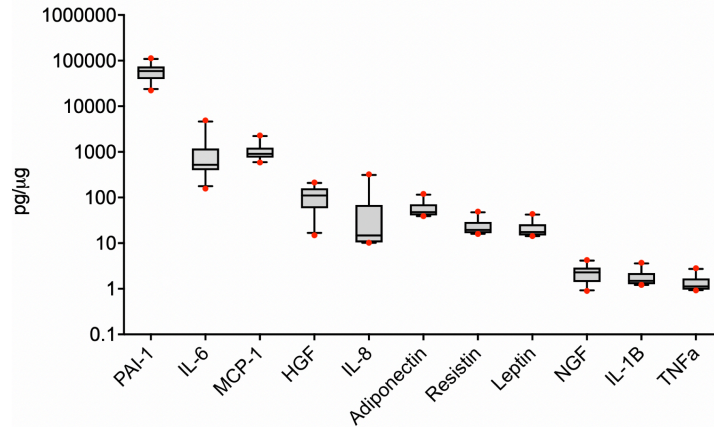

**Figure S1: Abundant PAI-1 in conditioned media of adipose stromal cells. Related to Figure 1.**

Conditioned media of 10 adipose stromal cell (ASC) lines were examined by FlexMap multiplexing assays for a panel of adipokines and cytokines. Secreted protein levels (pg), normalized to total proteins ( $\mu\text{g}$ ) of cells in culture at the time of harvest, show about two orders of magnitude more abundance of PAI-1 compared to the other adipokines/cytokines.

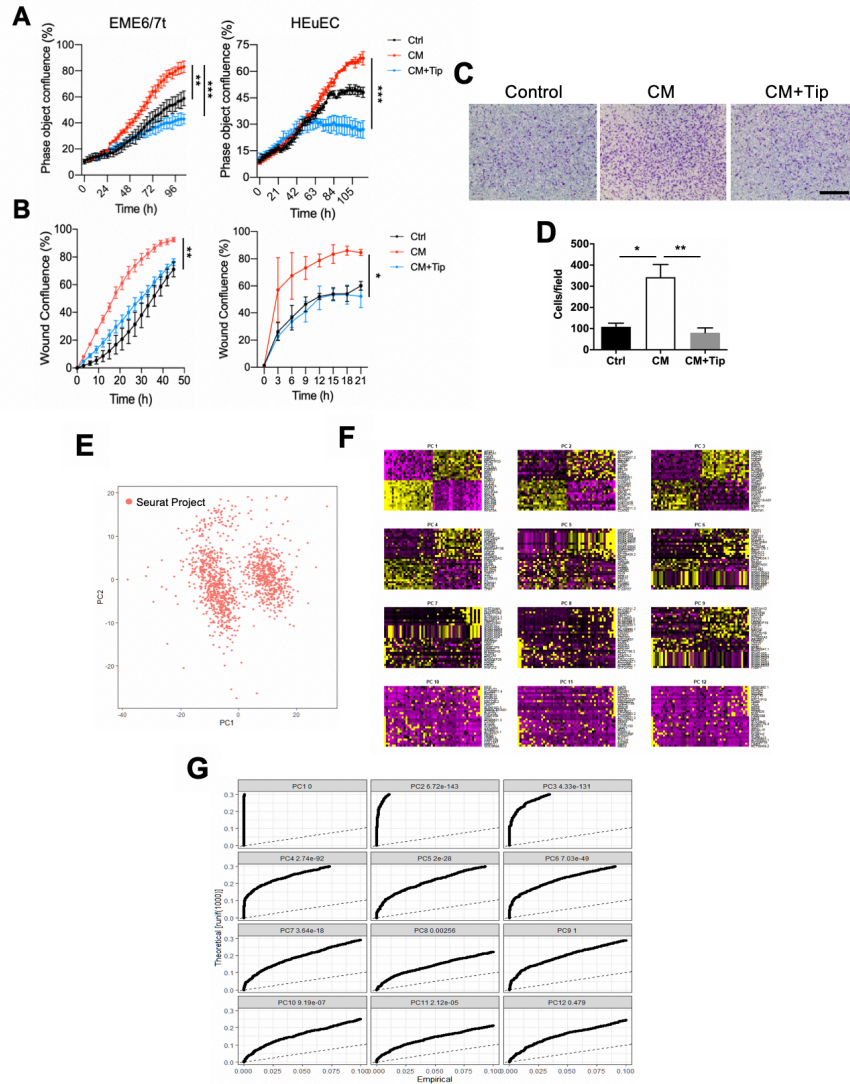

**Figure S2: PAI-1-initiated pro-tumorigenic phenotype in endometrial epithelial cells. Related to Figure 2.**

Immortalized EME6/7t endometrial epithelial cells (EECs) and an additional source of un-immortalized HEuEC primary cells were exposed to ASC-CM in the presence or absence of PAI-1 antagonist, Tip. Proliferation (A) and migration (B) rates in quadruplicate were determined using a live-cell imaging system IncuCyte. (C-D) Invasion assay of EME6/7t cells exposed to ASC-CM and CM+Tip, showing significantly enhanced invasive potential of EME6/7t cells after CM exposure, which was reversed by Tip. Scale: 500  $\mu$ m. \* $p < 0.05$ , \*\* $p < 0.01$ , \*\*\* $p < 0.001$ . (E) Principal component analysis (PCA) utilizing the most variable genes. (F) Heatmaps showing the genes and cells ordered by PCA scores and used to select principal components. Yellow indicating high gene expression, and purple indicating low expression. (G) The JackStraw plots displaying p-values for each principal component. Dashed line, uniform distribution; Solid curve, the significant principal component.

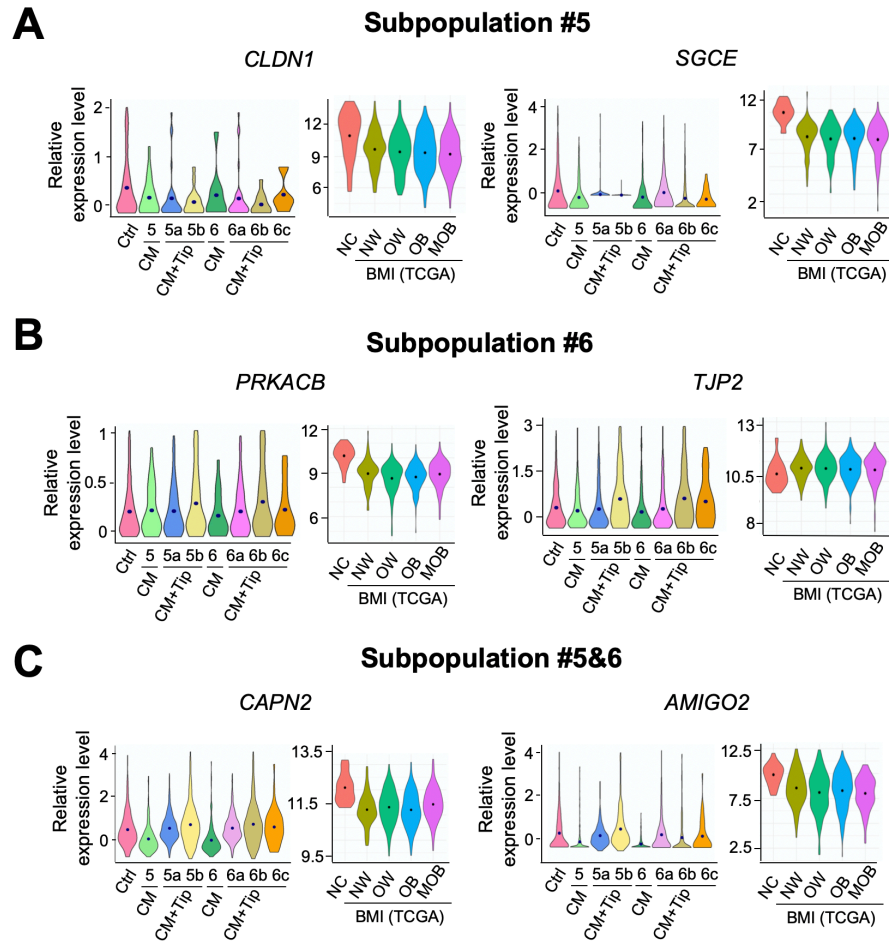

**Figure S3: Representative BMI-associated JAC genes were regulated both in EEC subpopulations #5 and 6 after exposure to ASC-CM. Related to Figure 3.**

Violin plots showing expression changes of (A) BMI-associated JAC genes corresponding to subpopulation #5, (B) BMI-associated JAC genes corresponding to subpopulation #6, (C) BMI-associated JAC genes that correspond to both subpopulations #5 and 6. The expression of genes in immortalized endometrial epithelial cells EME6/7t with or without exposure to ASC-CM (-/+ tiplaxtinin, Tip; plots on left) and in TCGA endometrial cancer cohort stratified by obesity status (plots on right). NC, non-cancer control; and cancer patients: NW, normal weight; OW, overweight; Ob, obese; MOB, morbidly obese.

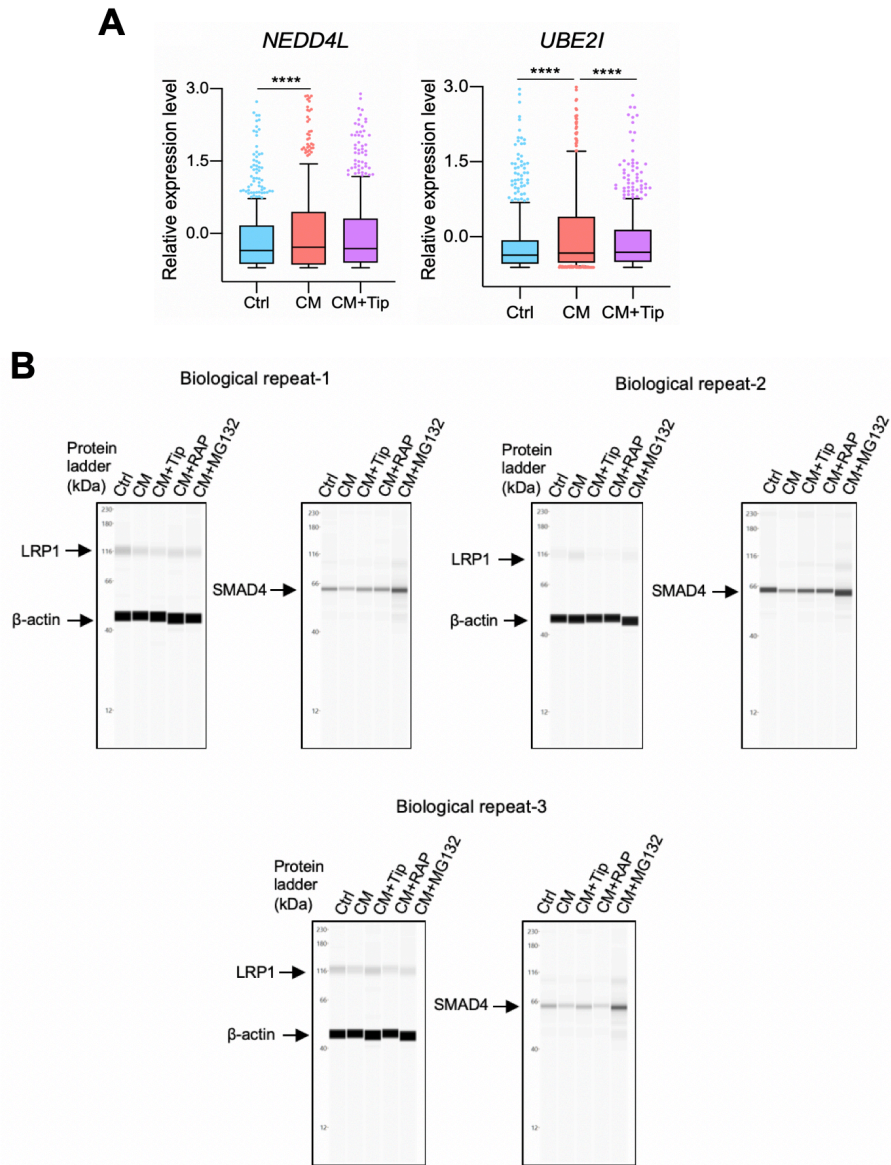

**Figure S4: PAI-1 upregulates *NEDD4L* and *UBE2I* genes and suppresses SMAD4 protein expression but not LRP1 in endometrial epithelial cells. Related to Figure 4.**

(A) Single-cell RNA-seq analysis reveals increased expression levels of *NEDD4L* and *UBE2I* in immortalized endometrial epithelial cells EME6/7t exposed to ASC-CM relative to cells additionally treated with a PAI-1 antagonist (Tip) or control EECs. \*\*\*\* $p < 0.0001$ . (B) Capillary Western immunoassays showing protein expression levels of LRP1 and SMAD4 of EME6/7t cells in three independent experiments (three biological replicates).

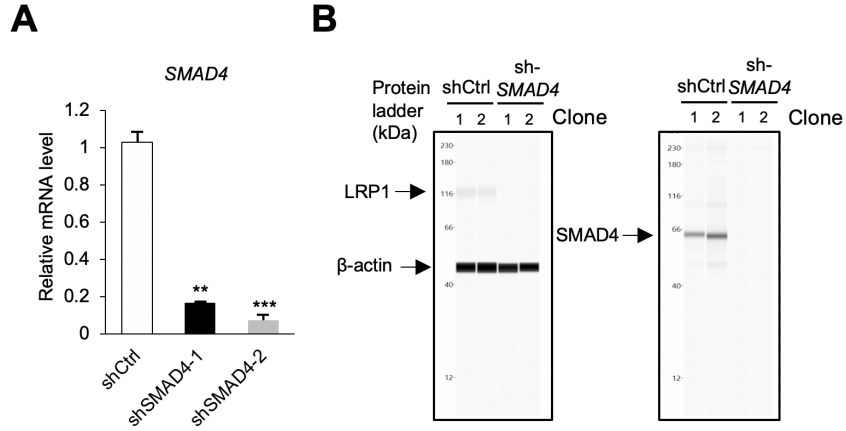

**Figure S5: Expression levels of SMAD4 and LRP1 in two *SMAD4* table knockdown clones.**

**Related to Figure 5.**

(A) Bar plots showing efficient *SMAD4* knockdown in EME6/7t cells in the two stable sh*SMAD4* clones relative to control shCtrl clone. \*\* $p < 0.01$ , \*\*\* $p < 0.001$ . (B) Capillary Western immunoassays showing protein expression levels of LRP1 and SMAD4 in the two stable shCtrl clones or two stable sh*SMAD4* clones of EME6/7t cells.

**Table S2: Patients information for CyTOF analysis. Related to Figure 6.**

| <b>Case#</b> | <b>Age</b> | <b>BMI</b> | <b>Ethnicity</b>    | <b>FIGO Stage</b> | <b>FIGO Grade</b> | <b>Histology</b> | <b>Type</b> |
|--------------|------------|------------|---------------------|-------------------|-------------------|------------------|-------------|
| P07          | 61         | 20.5       | African American    | IB                | 3                 | Papillary serous | 2           |
| P08          | 56         | 21.7       | non-Hispanic, white | IIIC2             | 3                 | Papillary serous | 2           |
| P09          | 72         | 28.0       | Hispanic            | IA                | 1                 | Endometrioid     | 1           |
| P14          | 35         | 30.0       | Hispanic            | II                | 3                 | Endometrioid     | 1           |
| P06          | 43         | 34.1       | Hispanic            | IA                | 1                 | Endometrioid     | 1           |
| P15          | 56         | 34.7       | non-Hispanic, white | IA                | 2                 | Endometrioid     | 1           |
| P03          | 31         | 41.6       | Hispanic            | IA                | 1                 | Endometrioid     | 1           |
| P10          | 53         | 48.1       | Hispanic            | IA                | 1                 | Endometrioid     | 1           |
| P11          | 29         | 55.0       | Hispanic            | IB                | 1                 | Endometrioid     | 1           |



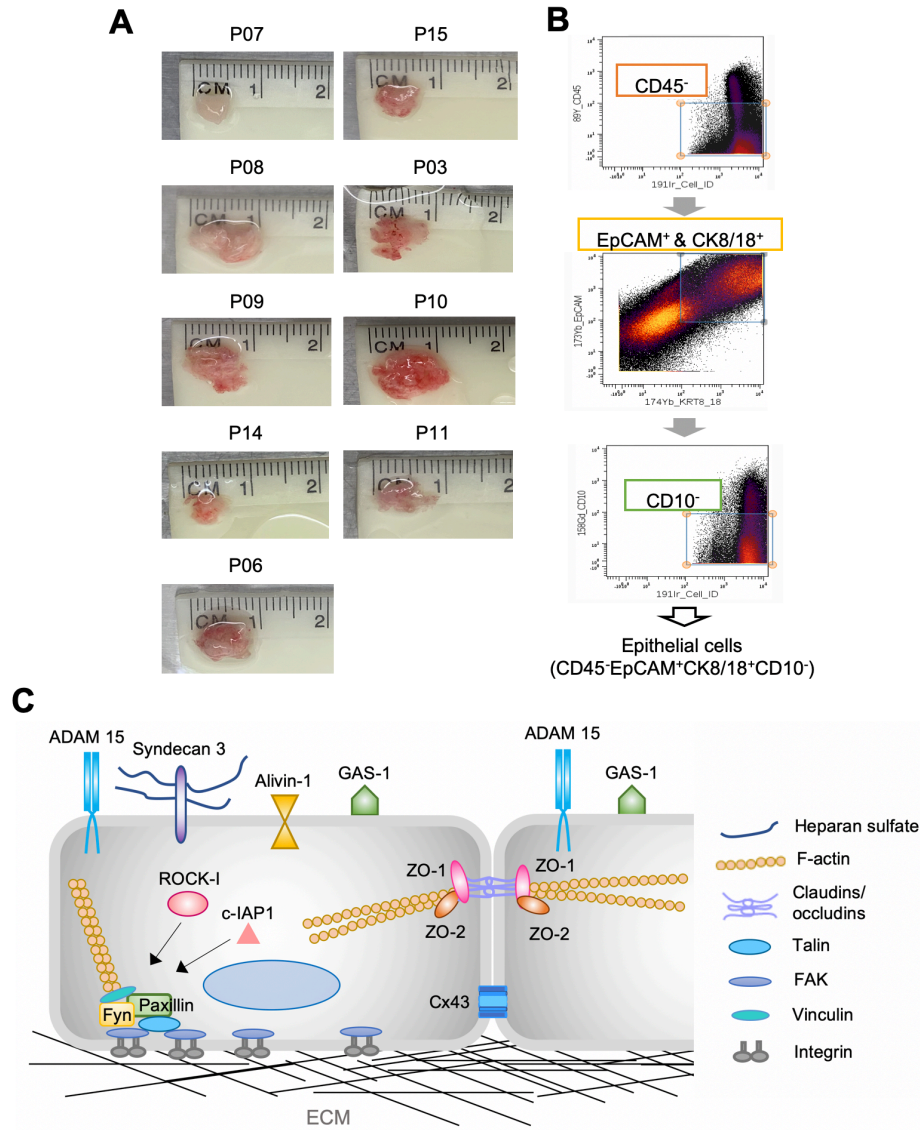

**Figure S6: Isolating epithelial tumor cells from tissue of endometrial cancer patients and a schematic overview of JAC functions in epithelial cells. Related to Figure 6.**

(A) Tumor appearance from endometrial cancer patients. (B) CyTOF gating strategies to analyze epithelial cells from endometrial tumors. (C) Apical surface protein, growth arrest-specific 1 (Gas1), apical junction (ADAM15, syndecan 3 (SDC3), and AMIGO2), and tight junction (zonula occludens (ZO)1 and ZO2) maintain epithelial polarity. Gap junction (connexin 43, Cx43) connects cell to cell and mediates intercellular communication. Rho-associated protein kinase 1 (ROCK1) and cellular inhibitor of apoptosis protein 1 (cIAP1) are focal adhesion regulators. Paxillin and Fyn associated with integrins adhere to the extracellular matrix (ECM).

**Table S3: CyTOF antibody panel. Related to Figure 6.**

| <b>Protein name</b> | <b>Gene name</b> | <b>Clone</b> | <b>Metal</b> | <b>Cellular functions</b>                                                                                 |
|---------------------|------------------|--------------|--------------|-----------------------------------------------------------------------------------------------------------|
| Gas1                | <i>GAS1</i>      |              | 166Er        | Cooperate with hedgehog signals                                                                           |
| AMIGO2              | <i>AMIGO2</i>    | 30G9.1G2     | 143Nd        | Decrease cell adhesion/migration                                                                          |
| SDC3                | <i>SDC3</i>      |              | 141Pr        | Cooperate with hedgehog signals                                                                           |
| ADAM15              | <i>ADAM15</i>    | 23G9         | 154Sm        | Bind to $\alpha v\beta 3$ and $\alpha 5\beta 1$ integrin to mediate cell motility                         |
| Cx43                | <i>GJA1</i>      |              | 162Dy        | Assemble to gap-junction intercellular communication channels                                             |
| ZO1                 | <i>TJP1</i>      | 1A12         | 169Tm        | Interaction with F-actin and occludin in tight junction complexes                                         |
| ZO2                 | <i>TJP2</i>      | 3E8D9        | 146Nd        | Interaction with F-actin and occludin in tight junction complexes                                         |
| ROCK1               | <i>ROCK1</i>     | EP786Y       | 161Dy        | Cooperate with zonula adherens organization, RhoA signaling, and cortical tension                         |
| Paxillin            | <i>PXN</i>       | Y113         | 160Gd        | As a docking protein to recruit signaling proteins to focal adhesions and coordinate downstream signaling |
| Fyn                 | <i>FYN</i>       |              | 153Eu        | Associate with Src and focal adhesion kinase (FAK) to regulate cell migration                             |
| cIAP1               | <i>BIRC2</i>     |              | 167Er        | Control Rho GTPases signaling for focal adhesion formation                                                |
| TGFR-2              | <i>TGFBR2</i>    |              | 165HO        | The ligand-binding receptor for TGF $\beta$ signaling                                                     |
| SMAD2               | <i>SMAD2</i>     | 31H15L4      | 152Sm        | Form complex with SMAD3 or/and SMAD4 to induce TGF $\beta$ signaling                                      |
| SMAD4               | <i>SMAD4</i>     | 253343       | 164Dy        | A central mediator of TGF $\beta$ signaling and induces a tumor suppressive effect                        |
| CK 8/18             | <i>KRT 8/18</i>  | C51          | 174Yb        | Cytoskeletal proteins and be induced by endometrial cancer invasion                                       |
| EpCAM               | <i>EPCAM</i>     |              | 173Yb        | As an epithelial tumor cell marker and associate with epithelial proliferation                            |

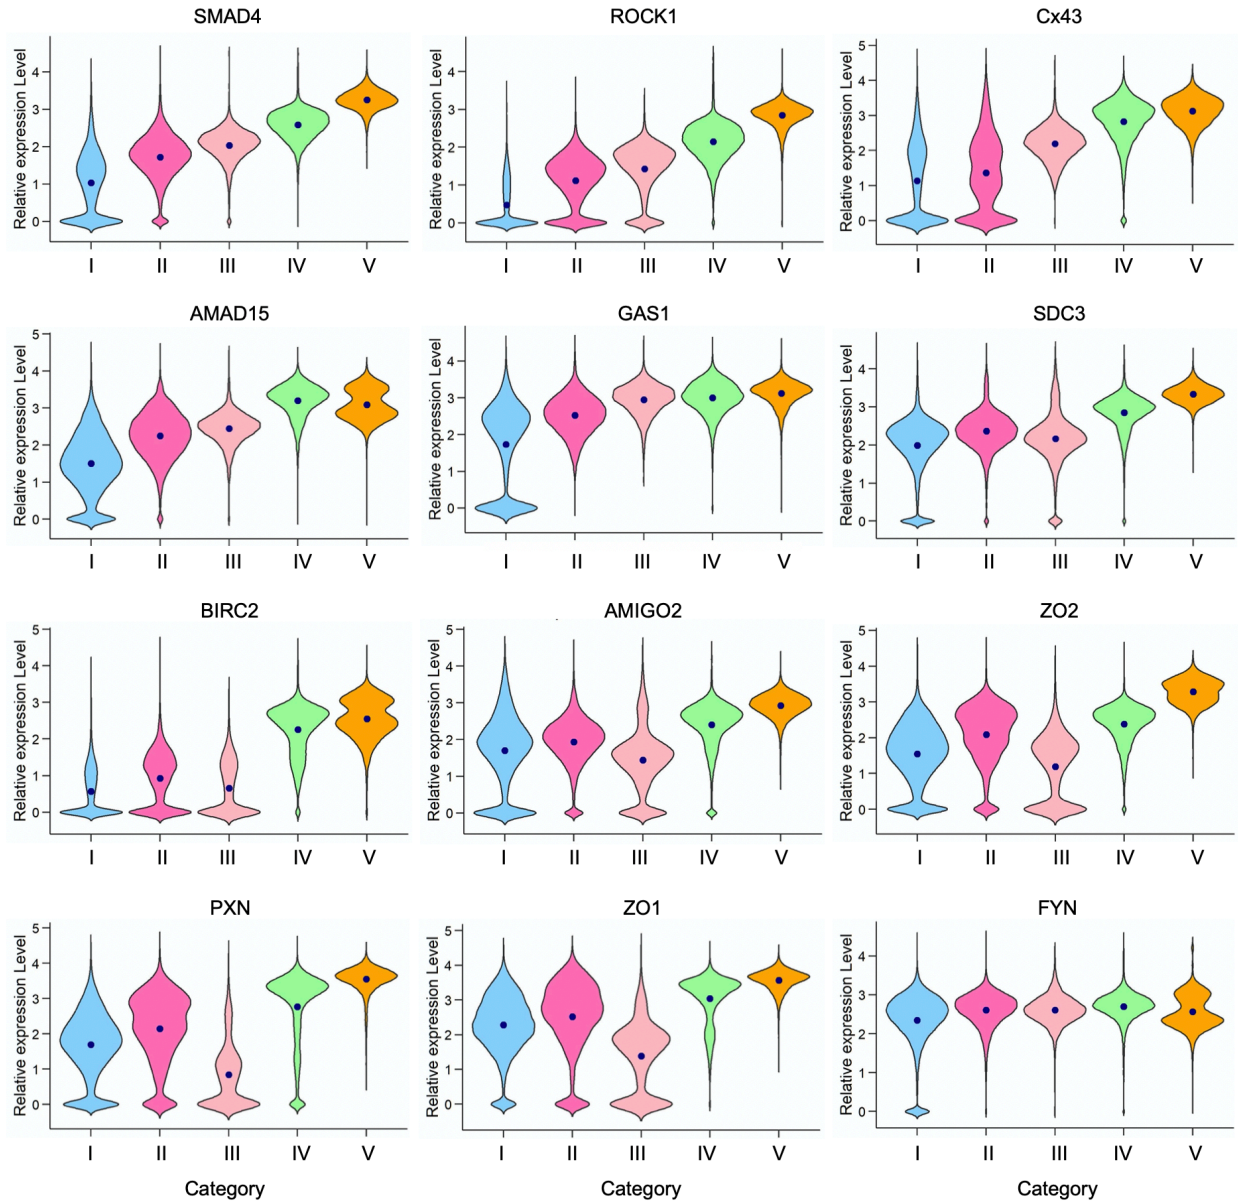

**Figure S7: Violin plots showing expression patterns of SMAD4 and 11 proteins associated with junction and adhesion complex (JAC) within the five categories. Related to Figure 7.**

**Table S4: Primer sequences for ChIP-qPCR. Related to STAR Methods.**

| <b>Gene</b>      | <b>Sequence 5'</b>       | <b>Sequence 3'</b>               |
|------------------|--------------------------|----------------------------------|
| <i>SMAD4 #1</i>  | GTGGCGCCTGTGATTTGCTTCT   | CCTTGCCATGTGGTGCTCTCC            |
| <i>SMAD4 #2</i>  | CTTTGTTCCAGCCTCACTT      | TAGTTACCTATTGCTGTATAACAAT<br>CTC |
| <i>AMIGO2 #1</i> | CCAACTCTTCCCTCCCCT       | TAACAAATCTGCCTGACCACA            |
| <i>AMIGO2 #2</i> | TAATAATAATCCCAGAGCAGACCT | GGAAATGAGAGAGAGAGAACG            |
| <i>SDC3</i>      | TGCCAAAACAAGGGAGTC       | GTGTGTCATTTCAAGGGTCTA            |
| <i>PXN</i>       | CACAGCCACCCTCCCTA        | TGTTATTATTACCCAATTTCCGAGT        |
| <i>ADAM15</i>    | ATGACACACAATAGGGGC       | TTCACATTCAGTTTGCTTCACGA          |
| <i>BIRC2</i>     | TGGAGAGGGCACAAACC        | CAACTGGACGCTCATCG                |
| <i>FYN #1</i>    | GGTCTGATTTAGGGGGTTT      | CTCAAGGTGCTGTCTCCA               |
| <i>FYN #2</i>    | AGCAAAAGTCTGGAGGAAG      | CGAGGTTTTTTGGGGGT                |
| <i>GAS1 #1</i>   | AGCTTCCCACGGCAGACCAA     | GGAGGCCCAGCACTAGGAGATTC          |
| <i>GAS1 #2</i>   | CGTGCCCATTTATTCCGTCTTCT  | GCGCCAGGCATCGTTTTCA              |
| <i>GJA1</i>      | CCAAGTAGAGGCGTTCA        | GGCTGGTAAATGTGGAAGG              |
| <i>ROCK1</i>     | GAGAGGTCCAAAGTCCAG       | GTTTCGTTCAATTCATTGTTGT           |
| <i>TJP2</i>      | TTCGACCCCCGCCTGATTC      | CCGCAACCCGCCCTGAG                |
| <i>TJP1</i>      | GGTCTCGAACTCCTGGGCTCAT   | CAGTCCTCGTTGCACGGTAAT            |

**Table S5: Primer sequences for real-time qPCR. Related to STAR Methods.**

| <b>Gene</b>   | <b>Sequence 5'</b>     | <b>Sequence 3'</b>       |
|---------------|------------------------|--------------------------|
| <i>AMIGO2</i> | TGCTGGTCTTTTGGTATCGTA  | GCACGAAAGGAACCATTGA      |
| <i>BIRC2</i>  | GGTTTTTATTATGTGGGTCGC  | GCTGTTCAAGAAGATGAGGA     |
| <i>SDC3</i>   | GGTCACACTGCTCATCTATC   | GAACTCCTCCTGCTTGTC       |
| <i>PXN</i>    | CACCCAACAGCAGACAC      | TTGAAATCCGACAGCGAAG      |
| <i>FYN</i>    | CCCAACTACAACAACCTCCAC  | GCAAGGTCCCCGTATGAGA      |
| <i>TJP1</i>   | ACGGACCAGTTTTCTCG      | TGGGTAGGGCTGTTTGT        |
| <i>GAS1</i>   | CCGCTACCTGACCTACT      | TGTTCTCCTTGACCGACT       |
| <i>GJA1</i>   | GGTGACTGGAGCGCCTTAG    | GCGCACATGAGAGATTGGGA     |
| <i>ROCK1</i>  | ATGAAGATGAATAAGGAAGGCA | AAATACCCCAACCGACC        |
| <i>TJP2</i>   | GGGAAGGTCGCTGCTATTGT   | CTCTCGCTGTAGCCACTCC      |
| <i>ADAM15</i> | GAGGGACACACTTTGGAGAA   | GACCACCAAGCCTCTGA        |
| <i>SMAD4</i>  | CTCATGTGATCTATGCCCCGTC | AGGTGATACAACCTCGTTCGTAGT |
